# 1                   **Creation of a Shortened Version of the of the Sleep**

## 2                                   **Disorders Questionnaire (SDQ)**

3

4                                   **Short Title: Short version of SDQ**

5

6

7    Kathleen Biard<sup>1¶</sup>, Joseph De Koninck<sup>1¶2</sup>, Alan B. Douglass<sup>2¶3\*</sup>

8

9

10   <sup>1</sup> School of Psychology, Faculty of Social Sciences, University of Ottawa, Ottawa, Ontario,  
11    Canada

12

13   <sup>2</sup> University of Ottawa Institute of Mental Health Research at the Royal Ottawa Mental Health  
14    Center, Ottawa, Ontario, Canada

15

16   <sup>3</sup> Psychiatry Department, Faculty of Medicine, University of Ottawa, Ottawa, Ontario, Canada.

17

18

19

20

21   \*Corresponding author (ORCID ID 0001-6837-9799)

22

23    Email: [alan.douglass@theroyal.ca](mailto:alan.douglass@theroyal.ca) (ABD)

24

25   ¶ These authors contributed equally to this work

26

27

28

29

30

31 **Funding:**

32 A Canada Graduate Scholarship (CGS) from the Natural Sciences and Engineering Research  
33 Council (NSERC) supported the PhD studies of Dr. Biard and her analysis of the data.

34

35 **Competing Interests:**

36 Drs. Biard and De Koninck declare no competing interests

37 .

38 Dr. Douglass claims copyright of the resulting SDQ-2 questionnaire and may profit from its  
39 future commercialization. He is also a paid consultant to the Ottawa Police Association, which  
40 is sponsoring a validation study of the SDQ-2.

41

42

43

44

45

46

47

48

49 **Abstract:**

50

51 The 176-item Sleep Disorders Questionnaire (SDQ) was initially developed using canonical  
52 discriminant function analysis on 4 groups of sleep disorder patients, but it was never studied by  
53 factor analysis in its entirety. Several authors have criticized 2 of its subscales as being  
54 confounded with each other, and its narcolepsy scale as substantially over-diagnosing  
55 narcolepsy. This study describes its first exploratory factor analysis (EFA), the intent of which  
56 was to reassess item membership on the 4 existing subscales and to derive new scales to improve  
57 differential diagnosis between patient groups. It was also hoped that EFA could reduce the total  
58 number of questions, to increase speed of completion. The EFA was performed on the  
59 anonymized SDQ results from a retrospective review of the charts of 2131 persons from 7 sleep  
60 disorders clinics and research centers. Factors were assessed via scree plots and eigenvalues.  
61 The EFA identified four main factors: insomnia, daytime sleepiness, substance use, and sleep-  
62 disordered breathing. The insomnia factor had 3 subfactors: psychological symptoms of  
63 insomnia, subjective description of insomnia, and insomnia due to periodic limb movements.  
64 The sleepiness factor had two subfactors: daytime sleepiness and neurological symptoms of  
65 narcolepsy. The novel substance use factor was homogeneous, as was the sleep-disordered  
66 breathing factor. Importantly, the EFA reassigned items from the original SDQ's NAR, PSY,  
67 and PLM subscales to five of the new subscales. The Sleep Apnea (SA) subscale emerged  
68 mostly unchanged. The 7 resulting factors comprised only 66 items of the original 176-item  
69 SDQ. These results have allowed the creation of a new shorter questionnaire, to be called the  
70 SDQ-2. External validation of the SDQ-2 is currently underway. It will likely prove to be a

71 superior differential diagnostic instrument for sleep disorders clinics, compared to the original  
72 SDQ.

## 73 **List of Abbreviations**

74 Berlin Questionnaire: screening questionnaire for sleep apnea

75 BMI: Body Mass Index (kg/m<sup>2</sup>)

76 EFA: exploratory factor analysis

77 ESS: Epworth Sleepiness Scale

78 GAD-7: Generalized Anxiety Disorder, 7-item scale

79 MIES: Moral Injury Events Scale

80 NAR, PSY, PLM, SA: subscales of the original SDQ

81 OSA: obstructive sleep apnea

82 PCL-5: PTSD Checklist for DSM-5

83 PHQ-9: Patient Health Questionnaire (depression)

84 PLM: periodic limb movements

85 PSQI: Pittsburgh Sleep Quality Index

86 RLS: Restless Legs Syndrome

87 ROC: receiver operating characteristics (analysis)

88 SDB: sleep disordered breathing

89 SDQ: the original Sleep Disorders Questionnaire, 1994

90 SDQ-2: second edition of the SDQ, derived in the present paper

91 SQAW: Stanford University's Sleep Questionnaire and Assessment of Wakefulness

92 STOP-Bang: screening questionnaire for sleep apnea

- 93 TIA: transient ischemic attack
- 94 CAGE: alcohol screening questionnaire
- 95 ISI: Insomnia Severity Index
- 96

## 98 **Introduction:**

99           The aim of the original Sleep Disorders Questionnaire (SDQ) was to provide a self-report  
100 tool to assess the risk of having one of several sleep disorders. It was developed between 1983  
101 and 1994 by Douglass and colleagues[1] at Stanford University from their existing Sleep  
102 Questionnaire and Assessment of Wakefulness (SQAW)[2]. The latter had been difficult to use  
103 clinically due to its great length, over 800 items, and its many different response sets. SDQ  
104 retained only 175 of its items, which were then grouped, simplified, re-worded, and all changed  
105 to 5-point Likert scales. Body mass index (BMI) was added as the 176<sup>th</sup> item, to be entered by a  
106 clinician.

107           SDQ items were deemed to have adequate face validity when assessed by three Stanford  
108 sleep specialists, and were validated against polysomnographic diagnoses in a canonical  
109 discriminant function analysis of 519 patients[1]. This resulted in four subscales characteristic of  
110 patients with common sleep disorders (subscale name in brackets): narcolepsy (NAR), sleep  
111 apnea (SA), periodic limb movement disorder (PLM) and sleep disturbance due to psychiatric  
112 illness (PSY). Receiver Operating Characteristics (ROC) analysis for each subscale  
113 demonstrated adequate sensitivity, specificity, and positive / negative predictive values. Item  
114 test-retest reliability of the SDQ items was assessed by Pearson correlation over an interval of 3  
115 to 4 months in 130 patients and 71 normal controls[3]; the range of correlation was from  $r =$   
116 0.308 to 0.985, mean  $r^2 = 0.636$ .

117           With its focus on diagnosis, SDQ differed from scales like the Pittsburgh Sleep Quality  
118 Index (PSQI)[4], which focus on subjective descriptions of sleep that correlate most strongly  
119 with psychological mood and anxiety questionnaires. Another focus of SDQ has been the  
120 identification of sleep disorders that are co-morbid with other medical and psychiatric diagnoses.

121 This was exemplified by a study[5] using SDQ and the NoSAS questionnaire to look for sleep  
122 apnea in patients with diagnosed depression. Similarly, a controlled study[6] showed significant  
123 elevations of the PSY and PLM scales in patients with COPD.

124 Using the German translation of the SDQ, a study[7] of 3521 patients undergoing  
125 polysomnography showed significant sex differences by ANOVA within the 4 SDQ scales,  
126 which the authors postulated might explain the under-recognition of sleep-disordered breathing  
127 (SDB) in women.

128 A brief review of the literature regarding the 4 existing subscales of the SDQ and  
129 problems with their usage is as follows:

130 **SDQ-PLM subscale:** A 2006 study of 4,901 Swiss pharmacy customers by  
131 Schwegler[8] factor analyzed 45 items from the French and German translations of the SDQ.  
132 Their goal was to confirm the uniqueness of the 4 original SDQ subscales and to use the Epworth  
133 Sleepiness Scale[9] as an external validator. While their Cronbach's alpha coefficients for  
134 subscale homogeneity were similar to those in the original SDQ paper, they found that 60% of  
135 respondents scored above the originally-proposed pathological cut-off score of the PLM subscale  
136 (which they called "RLS scale"). They also found that the SDQ-PSY subscale had Spearman  
137 correlations of nearly 0.50 with both the PLM and NAR subscales, belying its intended purpose  
138 of identifying sleep disturbance in patients with psychiatric illness. To date, few other papers  
139 have reported use of the SDQ-PLM subscale. A validation by Valencia-Flores[10] found a  
140 correlation (Spearman's rho = 0.59) between the SDQ-PLM subscale and the PLM index on  
141 polysomnography in 14 patients with systemic lupus erythematosus. This subscale has also been  
142 used to screen for causes of sleep problems in dementia patients[11]. Overall, SDQ's PLM

143 subscale appeared to be tapping into more general features of insomnia rather than those due  
144 only to true RLS/PLMD.

145 **SDQ-NAR subscale:** This subscale was intended to be sensitive to the symptoms of  
146 patients suffering narcolepsy-cataplexy (narcolepsy type 1), but it also proved to include items  
147 that were endorsed by respondents who were sleepy due to other causes. Another surprise in the  
148 Schwegler study[8] was that 10% of their respondents scored above the 90th percentile on the  
149 NAR subscale. Since the population prevalence[12] of narcolepsy is less than 50/100,000, the  
150 SDQ-NAR subscale obviously grossly over-diagnosed narcolepsy. These results suggested that  
151 the NAR subscale might be reflecting non-narcoleptic sleepiness in the general population, in  
152 addition to neurological symptoms of narcolepsy. Unexpectedly, Parkinson Disease patients also  
153 scored significantly higher on the NAR subscale than controls[13], although this was attributed  
154 to side-effects of their dopaminergic medications rather than to narcolepsy.

155 **SDQ-SA subscale:** Some papers refer to this as “SA-SDQ”, but the preferred  
156 acronym is “SDQ-SA”. Its diagnostic intent was similar to that of other obstructive sleep apnea  
157 (OSA) questionnaires in the literature, such as the Berlin[14], STOP-Bang[15], NoSAS[16], and  
158 the OSA50[17]. In contrast to these, however, the SDQ-SA did not require any physical  
159 measurements or interaction with a clinician. SA is the SDQ subscale most commonly reported  
160 in the literature[18-21], likely due to its high sensitivity, specificity, PPV, and NPV when  
161 compared[22] to other sleep apnea questionnaires. Recent meta-analyses and reviews[23-26]  
162 have also supported the diagnostic usefulness of the SA subscale.

163 A much larger Swiss pharmacy study[27] of nearly 200,000 persons employed the SDQ-  
164 SA (called “SAS” by the authors) along with the Epworth Sleepiness Scale (ESS) to predict



165 motor vehicle accidents due to sleepiness. They found that SDQ-SA subscale homogeneity by  
166 Cronbach's alpha was again similar to the value in the original Douglass paper at  $\rho = 0.74$ .

167 Malow[28] found that SDQ-SA scores were significant predictors of ESS scores in 158  
168 epilepsy patients, whereas anti-epileptic medication dose or seizure frequency were not.  
169 Weatherwax[29] suggested that the original cutoff scores for diagnosing OSA in the general  
170 population should be lowered for epilepsy patients. The SDQ-SA subscale has also been used to  
171 identify OSA in patients with transient ischemic attacks (TIAs)[30-33] and in those with morbid  
172 obesity[34].

173 **SDQ-PSY subscale:** Scores on this subscale are high in hospitalized patients with  
174 major mood disorders or psychosis, likely due to the insomnia and sleep fragmentation often  
175 reported by these patients. It was partially validated[35] by correlation with the Carroll  
176 Depression Scale[36] in 44 patients diagnosed with Major Depressive Disorder ( $r = 0.70$ ,  $p <$   
177  $0.0001$ ). It also showed significant negative correlation with sleep efficiency on the  
178 polysomnograms of these same patients ( $r = -0.30$ ,  $p < 0.05$ ). Brower[37] used this subscale to  
179 assess the subjective sleep complaints of 74 patients recovering from alcohol dependence in a  
180 search for symptoms predictive of alcoholism relapse. Relapsers proved to have higher baseline  
181 scores on the SDQ-PSY subscale than those who abstained over a follow-up period of 3 – 12  
182 months. Some authors, including Brower, have however argued that the SDQ-PSY subscale is  
183 actually an insomnia subscale, based on their own studies [38,39]. In support, Sweere[40]  
184 performed a cluster analysis on a Dutch translation of 89 items from the SDQ and found a clear  
185 insomnia subscale in addition to 2 others that closely resembled the SDQ's SA and NAR  
186 subscales.

187 Taken together, the above findings suggest that the use of SDQ in non-clinical  
188 populations sometimes substantially over-diagnoses sleep pathologies. They also imply that  
189 some SDQ subscales are confounded with each other, possibly due to items concerning insomnia  
190 appearing on more than one subscale. Some of these problems could also be due to the fact that  
191 the original SDQ scales were derived not by factor analysis but rather by canonical discriminant  
192 function analysis on responses from 4 polysomnographically-diagnosed groups of sleep disorder  
193 patients.

194 Over the past 35 years, SDQ has been administered to tens of thousands of persons in  
195 medical and surgical outpatient clinics, general hospital inpatients, psychiatric hospitals, sleep  
196 disorders centers, and university psychology departments. It has been translated into French,  
197 Dutch, German, Italian, Spanish, Greek, Arabic, and Turkish; therefore, there is a substantial  
198 pool of data available for secondary analysis if the above problems could be resolved.

199 The rationale for the present study was to perform secondary analysis of new data to  
200 reassess the factor structure of the 4 existing subscales via EFA. It was also hoped that new  
201 subscales could be derived, such as a specific insomnia subscale. Finally, it was hoped to reduce  
202 the total number of questions from 176 to a more manageable size for the SDQ-2 revision.

203

## 204 **Methods:**

205 In all, SDQ responses of 2185 adults (1543 males, 642 females) were obtained for  
206 secondary analysis from a variety of hospitals and universities at which the SDQ had been  
207 completed prior to a laboratory nocturnal polysomnogram. Responses were gathered over the  
208 period 1986 – 2007, data collation was completed in 2008, and computer analysis took place  
209 from 2008-2011. These data therefore represented a sample of convenience and not a population

210 sample planned in advance. Since most of these sites were either psychiatric facilities or general  
211 sleep disorders centers, the focus of the SDQ is necessarily slanted towards symptoms  
212 experienced by such patients rather than the general population. Polysomnographic data are not  
213 reported here but will be reported in future papers on subscale validation.

214         Of the above total, 1356 participants were patients of Dr. Douglass at various hospitals,  
215 meaning that he was aware of their identities. The IRB allowed SDQs on these charts to be  
216 retrospectively reviewed with the proviso that their anonymity be ensured by assigning code  
217 numbers as case identifiers, instead of patient names or hospital chart numbers, before being  
218 included in the analysis. In the case of patients from other doctors or hospitals, code numbers  
219 were used exclusively. The data from 54 cases (2.5% of total) were discarded because more than  
220 20% of items were unanswered, leaving the data of 2131 persons (1497 males, 634 females) for  
221 the EFA. This gave a patient-to-questionnaire-item ratio of 12:1, which is commonly regarded  
222 as adequate for multivariate analysis. Any remaining missing values among the 176 items were  
223 replaced by using a multiple imputation procedure (“PROC-MI”, SAS version 9.1, SAS Institute,  
224 Cary, North Carolina), which operates via an iterative process. This version of SAS software  
225 was also used to compute the EFAs (“PROC-FACTOR”) using a varimax factor rotation of both  
226 orthogonal and oblique types. Eigenvalues and scree plots were used to determine the final  
227 number of factors to be retained.

228         We then examined the items in each factor by condition index to determine if there was  
229 significant collinearity; if so, all but one of the collinear variables was deleted. After the main  
230 factors had been determined, a secondary factor analysis was run on some factors that proved to  
231 be heterogeneous, in order to identify possible subfactors.

232 The original SDQ had 9 gender-specific items (4 for males, 5 for females). We dealt with  
233 these by removing all of them from the main factor analysis. We then split the file by sex and  
234 analyzed the responses of males and females separately, after removing items from the opposite  
235 sex. This also allowed us to verify whether the factor structure was similar in men and women.  
236 More detailed explanations of the statistical methods and results are shown in the Supporting  
237 Information section.

238 Under an authorization dated 2008-04-11 by the *University of Ottawa Social Sciences*  
239 *and Humanities Research Ethics Board* (File 02-08-16), secondary use of anonymized data from  
240 the institutions listed in the attached “Thank-you Attestation” was approved. The project was  
241 also approved in 2008 (File number 2008001) by the *Research Ethics Board of the Royal Ottawa*  
242 *Hospital*.

243

## 244 **Results:**

245 Clinical and demographic details about the SDQ respondents are found in Table 1. Fifty-  
246 four cases were deleted due to missing data, giving a case-wise missing rate of 2.5%. After  
247 deletions, the remaining variable-wise average missing rate was 3.1%, all of which were replaced  
248 by imputed values.

249

250 **Table 1: Characteristics of the respondents (n = 2185<sup>c</sup>).**

251

| DIAGNOSTIC GROUP                        | MALES       |              |              | FEMALES     |              |              |
|-----------------------------------------|-------------|--------------|--------------|-------------|--------------|--------------|
|                                         | N           | Mean Age     | SD           | N           | Mean Age     | SD           |
| Psychiatric Patients <sup>a</sup>       | 574         | 45.18        | 13.41        | 296         | 41.85        | 12.67        |
| General Practice Referrals <sup>b</sup> | 899         | 45.23        | 13.77        | 338         | 44.78        | 13.79        |
| Normal control subjects                 | 70          | 38.70        | 12.71        | 8           | 38.61        | 12.73        |
| <b>SUBTOTALS</b>                        | <b>1543</b> | <b>44.92</b> | <b>13.59</b> | <b>642</b>  | <b>43.35</b> | <b>13.27</b> |
| <b>Male + Female TOTAL</b>              |             |              |              | <b>2185</b> |              |              |

54 removed (missing data)      1497      2131      634

252  
253  
254  
255  
256  
257  
258  
259  
260  
261  
262  
263  
264  
265  
266  
267  
268  
269  
270  
271  
272

**Table 1 Legend:**

<sup>a</sup> Hospital inpatients and outpatients with mood disorders, schizophrenia, anxiety disorders, PTSD, or alcoholism. They were usually studied clinically to rule-out a possible physical sleep disorder but some took part in research sleep studies (baseline nights). All patients were studied without CPAP or other physical treatment for sleep apnea.

<sup>b</sup> Patients with a medical / surgical diagnosis who were referred by their general practitioner or specialist to rule out sleep apnea or physical causes of insomnia.

<sup>c</sup> A total of 54 respondents (2.5% of total) were removed due to having  $\geq 20\%$  missing items.

The EFA revealed four Main Factors when using a visually-determined scree cutoff, all of which had an eigenvalue  $> 5.0$  (Fig. 1).

=====  
**\*\*\*\* insert Fig. 1 about here \*\*\*\***

**Fig. 1 Legend:**

Scree Plot of all factors extracted by the EFA. The first 4 factors all have eigenvalues greater than 5, and are referred to as Main Factors in the text.

=====  
=====

273

274 The percentage of overall variance explained by these factors is shown in Table 2.

275 **Table 2: Percentage of overall variance explained by the 4 Main Factors.**

276

| Factor <sup>a</sup> | Orthogonal Rotation | Oblique Rotation |                 |
|---------------------|---------------------|------------------|-----------------|
|                     |                     | Shared variance  | Unique variance |
| 1                   | 12.76               | 15.43            | 8.92            |
| 2                   | 8.89                | 11.53            | 6.69            |
| 3                   | 6.68                | 8.67             | 5.91            |
| 4                   | 6.57                | 6.46             | 6.43            |
| <b>TOTAL</b>        | <b>34.90</b>        | <b>42.09</b>     | <b>27.95</b>    |

277

278

279

280 **Table 2 Legend:**

281 <sup>a</sup> Factor numbers in the table refer to those in Figure 1.

282

283

284 Inter-correlations of the Main Factors' oblique rotations are shown in Table 3.

285

286

287

288 **Table 3: Inter-Correlations of the 4 Main Factors (Oblique rotation).**

289

|         | Factor1 | Factor2 | Factor3 | Factor4 |
|---------|---------|---------|---------|---------|
| Factor1 | 1       | 0.264   | 0.189   | -0.021  |
| Factor2 |         | 1       | 0.097   | 0.069   |
| Factor3 |         |         | 1       | -0.091  |
| Factor4 |         |         |         | 1       |

290

291

292 **Table 3 Legend:**

293 These intercorrelations demonstrate adequate independence of the Main Factors, considering that

294 Factors 1 and 2 have subfactors. This table was calculated on Factors from which collinear items

295 had been removed.

296

297

---

298           Secondary EFA of Main Factor 1 resulted in 3 subfactors with clinical relevance, while  
299 the same process on Main Factor 2 resulted in 2 subfactors. Therefore, 7 useful factors were  
300 extracted from the SDQ data. Scree plots of the secondary EFAs for Main Factors 1 to 4 are  
301 described in Figs. S1 -- S4.

302           Item loadings on the Main Factors and their subfactors are shown in Tables 4 – 7. In  
303 these tables, items that were also present on the four original SDQ subscales are identified with  
304 different markers. Items selected for the final SDQ-2 subscales had to have item loadings of 0.4  
305 or greater on the above factors.

306           Subscale homogeneity was calculated via Cronbach's alpha for each of the 7 subscales  
307 and is shown below.

308           Collinearity diagnostics on all factors are shown in S1 Appendix, along with the names of  
309 items that were removed to resolve the collinearity. The number of items removed from Main  
310 Factors 1 – 4 by this process were 0, 2, 1, and 2, respectively.

311           In addition to the four Main Factors, another 15 factors resulted from the primary EFA,  
312 numbered 5 – 19, all with eigenvalues  $\geq 1$ . The subject matter of these factors and their item  
313 loadings are summarized in S1 Table. While they do not uniquely identify any clinical sleep  
314 disorders, they may be of interest to some readers considering the large pool of respondents in  
315 this study. Examples of their content include: psychosomatic causes of insomnia; seizures and  
316 parasomnias; tonsil and adenoid problems; and sleepiness due to shift work.

317           Below is a detailed description of the 7 factors identified above and their homogeneity  
318 (Cronbach's alphas). These factors are proposed to be the subscales of the new SDQ-2.

319

320 **Main Factor 1: Insomnia:**

321 **Subfactor 1A “InsPsy”:** Psychological features of insomnia ( $\alpha = 0.919$ )

322 **Subfactor 1B “InsSubj”:** Subjective description of insomnia severity ( $\alpha = 0.831$ )

323 **Subfactor 1C “InsPLM”:** Insomnia due to leg sensations ( $\alpha = 0.823$ )

324

325

326 Table 4 lists items that load on Main Factor 1 using an orthogonal rotation. Results for

327 the oblique rotation were similar. This factor incorporates 5 items from the original SDQ-PSY

328 subscale (marked with “Ψ”), as well as 5 from the original SDQ-PLM subscale (marked with

329 “L”). Also shown are 7 of the SDQ items from Brower’s 1998 insomnia subscale[37]. The

330 scree plot of the secondary factor analysis of Main Factor 1 (S1 Fig.) does not have a clear visual

331 cut-off but there are 3 factors having an eigenvalue  $\geq 1$ . When using an orthogonal rotation,

332 Subfactor 1A explained 6.1% of the overall dataset variance, subfactor 1B explained 5.6% and

333 subfactor 1C explained 2.8%. Subfactor 1A included psychological items such as “my sleep is

334 disturbed by worrying.” Subfactor 1B is a subjective description of insomnia severity, with items

335 such as “I get too little sleep at night.” The 4 items on Subfactor 1C describe limb movements

336 disturbing sleep.

337 =====

338



339

340 **Table 4: Item loadings on each subfactor of Main Factor 1 (orthogonal rotation).**

341

342

| Item | 1A           | 1B            | 1C           | Source <sup>a</sup> | Brief Item Description                                      |
|------|--------------|---------------|--------------|---------------------|-------------------------------------------------------------|
| 34   | <b>0.801</b> | 0.187         | 0.173        | -                   | sleep disturbed by worrying                                 |
| 8    | <b>0.787</b> | 0.121         | 0.172        | -                   | worry about things at bedtime                               |
| 33   | <b>0.761</b> | 0.169         | 0.196        | Ψ                   | sleep disturbed by sadness or depression                    |
| 7    | <b>0.737</b> | 0.116         | 0.195        | Ψ                   | feel sad and depressed at bedtime                           |
| 32   | <b>0.711</b> | 0.268         | 0.196        | -                   | sleep disturbed by racing thoughts                          |
| 6    | <b>0.681</b> | 0.201         | 0.129        | Ψ                   | thoughts race through my mind at bedtime                    |
| 10   | <b>0.625</b> | 0.398         | 0.176        | -                   | afraid of not being able to go to sleep                     |
| 36   | <b>0.587</b> | 0.370         | 0.183        | -                   | being unable to get back to sleep if should wake            |
| 130  | <b>0.566</b> | 0.226         | 0.060        | -                   | mental stress, worry, or anxiety worsens sleep              |
| 13   | <b>0.537</b> | <b>0.487</b>  | 0.125        | -                   | not able to get to sleep once awake at night                |
| 3    | <b>0.517</b> | <b>0.510</b>  | 0.144        | Ψ*                  | have trouble getting to sleep at night                      |
| 17   | 0.390        | 0.240         | 0.138        | -                   | sleep is disturbed by noise                                 |
| 2    | 0.174        | <b>0.802</b>  | 0.177        | *                   | a poor night's sleep                                        |
| 87   | 0.169        | <b>0.761</b>  | 0.182        | *                   | problem with sleep                                          |
| 14   | 0.195        | <b>0.731</b>  | 0.285        | -                   | night sleep is restless and disturbed                       |
| 1    | 0.209        | <b>0.714</b>  | 0.097        | *                   | too little sleep at night                                   |
| 44   | 0.121        | <b>0.707</b>  | 0.180        | *                   | feel that sleep is abnormal                                 |
| 4    | 0.132        | <b>0.685</b>  | 0.185        | L*                  | wake up often during the night                              |
| 45   | 0.432        | <b>0.547</b>  | 0.088        | L*                  | respondent suspects they have insomnia                      |
| 154  | 0.295        | <b>0.469</b>  | 0.022        | L                   | longest wake period at night                                |
| 43   | 0.368        | <b>0.403</b>  | 0.084        | Ψ*                  | been unable to sleep at all for several days                |
| 114  | 0.308        | <b>0.367</b>  | 0.147        | -                   | prescription hypnotics [ <i>kept due to face validity</i> ] |
| 153  | -0.263       | <b>-0.552</b> | -0.040       | -                   | hours of sleep at night [ <i>reverse coded on SDQ-2</i> ]   |
| 31   | 0.124        | 0.209         | <b>0.837</b> | L                   | sleep disturbed by "restless legs"                          |
| 12   | 0.151        | 0.207         | <b>0.808</b> | L                   | have "restless legs" when falling asleep                    |
| 35   | 0.323        | 0.167         | <b>0.678</b> | -                   | sleep disturbed by muscular tension                         |
| 9    | 0.370        | 0.183         | <b>0.632</b> | -                   | muscular tension at bedtime                                 |

343

344 **Legend for Table 4:**

345 Subfactor loadings are shown in order of decreasing magnitude. Loadings in gray highlight

346 indicate factor loadings of 0.4 or greater that were selected as SDQ-2 scale items.

347 **Item:** Numerical label of this item on the original SDQ.

348 **1A:** Subfactor related to psychological causes of insomnia.

349 **1B:** Subfactor related to a subjective description of insomnia severity.

350 **1C:** Subfactor related to insomnia attributed to leg sensations.

351 **<sup>a</sup>Source:** Indicates item appeared on a subscale of the original SDQ, as follows:

352 **L:** SDQ-PLM subscale.

353 **Ψ:** SDQ-PSY subscale.

354 **“\*”:** Brower’s insomnia subscale[37] that predicts alcoholism relapse.

355 **“-“:** Was not a member of an SDQ subscale.

356 =====

357

358 Items 17 (“sleep is disturbed by noise”) and 114 (“use prescription hypnotics to sleep”) only approached criterion on subfactors A and B (loadings of 0.39 and 0.37 respectively) but will be included in those subfactors due to face validity. Items 3, 13 and 45 co-load on both subfactors A and B. Item 13 (“I fear not being able to get back to sleep after waking”) will be associated with subfactor 1A while item 3 (“trouble getting to sleep at night”) and item 45 (“suspect that I have insomnia”) will be associated with subfactor 1B.

364

## 365 **Main Factor 2: Narcolepsy and Daytime Sleepiness**

366 **Subfactor 2A “EDS”:** Excessive Daytime Sleepiness ( $\alpha = 0.827$ )

367 **Subfactor 2B “NAR”:** Narcolepsy symptoms ( $\alpha = 0.829$ )

368

369 Table 5 lists items that have a loading of 0.4 or higher on either the orthogonal or oblique rotations on this factor. Main Factor 2 incorporates 13 of the 15 items from the original SDQ-NAR (narcolepsy) subscale, which are marked with “#”.

372

373

374

375 **Table 5: Item loadings on each subfactor of Main Factor 2 (orthogonal rotation).**  
 376

| Item | 2A           | 2B           | Source | Brief Item Description                                  |
|------|--------------|--------------|--------|---------------------------------------------------------|
| 55   | <b>0.834</b> | 0.149        | #      | very sleepy during the day, struggle to stay awake      |
| 41   | <b>0.714</b> | 0.101        | -      | sometimes very sleepy in the daytime, in cycles         |
| 58   | <b>0.700</b> | 0.201        | #      | trouble doing job because of sleepiness / fatigue       |
| 59   | <b>0.652</b> | 0.176        | #      | too sleepy to drive                                     |
| 56   | <b>0.599</b> | 0.144        | #      | fall asleep eating, on phone, in bus, TV, reading, etc. |
| 42   | <b>0.582</b> | 0.272        | #      | have slept/been sleepy for several days at a time       |
| 158  | <b>0.518</b> | 0.136        | -      | number of daytime naps                                  |
| 157  | <b>0.467</b> | 0.215        | -      | car accidents due to sleepiness                         |
| 91   | <b>0.429</b> | 0.100        | -      | sleeping more than previously                           |
| 115  | 0.281        | 0.280        | -      | prescription drug to stay awake in day                  |
| 161  | -0.290       | -0.042       | -      | refreshed for how long after day nap                    |
| 39   | 0.415        | <b>0.743</b> | #      | Feel paralyzed after a nap                              |
| 60   | 0.126        | <b>0.681</b> | #      | hallucinations before/after nap while awake             |
| 11   | 0.034        | <b>0.661</b> | #      | paralyzed when falling asleep                           |
| 40   | 0.047        | <b>0.657</b> | #      | hallucinations after waking in the morning              |
| 67   | 0.243        | <b>0.617</b> | #      | sudden muscular weakness with strong emotions           |
| 61   | 0.228        | <b>0.595</b> | -      | vivid dreams during naps                                |
| 66   | 0.193        | <b>0.585</b> | #      | “weak knees” when laughing                              |
| 64   | 0.313        | <b>0.495</b> | -      | nonsense behaviour                                      |
| 63   | 0.330        | <b>0.446</b> | #      | driven car to wrong place, can’t remember how           |
| 57   | 0.316        | <b>0.357</b> | #      | bad grades in school because of sleepiness              |
| 156  | 0.255        | 0.260        | -      | work accidents due to sleepiness                        |

377

378 **Legend for Table 5:**

379 **Item:** Numerical label of this item on the original SDQ;

380 **2A:** Subfactor related to excessive daytime sleepiness;

381 **2B:** Subfactor related to neurological symptoms of narcolepsy;

382 **Source:** This item appeared on a subscale of the original SDQ, as follows:

383 “#”: SDQ-NAR subscale

384 “-“: Was not a member of an SDQ subscale.

385

386 The scree plot (S2 Fig.) from the secondary factor analysis on Main Factor 2 showed a  
 387 clear visual cut-off point after the second factor. Subfactor 2A explained 4.9% of the overall  
 388 dataset variance and included items that describe subjective daytime sleepiness from any cause  
 389 (“I am sometimes too sleepy to drive”). Subfactor 2B explained 4.6% of the overall variance and  
 390 describes classical symptoms of narcolepsy (“I am paralyzed when falling asleep”).

391 No items co-loaded onto the two subfactors. SDQ items 115, 161, and 156 did not load  
 392 significantly onto either subfactor, nor on the main factor and so will be omitted.

393

### 394 **Main Factor 3: Substances Affecting Sleep (“SUBST”), $\alpha = 0.685$**

395 This factor concerns persons who report substance use or abuse and its effect on sleep.

396 Table 6 lists the items that have a loading of 0.4 or higher on this factor, on either the orthogonal  
 397 or oblique rotations. Factor 3 bears no relation to any subscale of the original SDQ.

398

399

400 **Table 6: Item loadings on each subfactor of Main Factor 3 (orthogonal rotation).**

401

| Item   | 3A           | 3B            | Source | Brief Item Description               |
|--------|--------------|---------------|--------|--------------------------------------|
| 105    | <b>0.773</b> | 0.063         | -      | use alcohol in order to get to sleep |
| 111    | <b>0.698</b> | 0.059         | -      | used marijuana to help get to sleep  |
| 109    | <b>0.698</b> | 0.102         | -      | used "street drugs"                  |
| 107    | <b>0.697</b> | 0.100         | -      | unaware of actions when drinking     |
| 110    | <b>0.637</b> | 0.044         | -      | used tobacco to help get to sleep    |
| 108    | <b>0.633</b> | 0.055         | -      | tobacco within 2 hours of bedtime    |
| 165    | 0.023        | <b>0.861</b>  | -      | weight at age 20                     |
| 172    | 0.071        | <b>0.831</b>  | -      | height                               |
| Gender | -0.158       | <b>-0.821</b> | -      | 1 = male, 2 = female                 |

402

#### 403 **Legend for Table 6:**

404 Main Factor 3 relates to subjective sleep difficulties related to substance use or abuse.

405 **Item:** Numerical label of this item on the original SDQ.

406           **3A, 3B:** Sub-factorizations of Main Factor 3. Items on 3B *were not kept* for SDQ-2

407           **Source:** None of these items appeared on any subscale of the original SDQ.

408           =====

409           We performed a secondary factor analysis on this third factor to determine if it was  
410 homogenous. The scree plot (S3 Fig.) shows a clear visual cut-off after the second factor,  
411 eigenvalue >1. Subfactor 3A explains 3.5% of the overall dataset variance while subfactor 3B  
412 explains 2.1%. Subfactor 3A included all of this subfactor's items except 3 that are linked to  
413 males: gender, item 172 (height), and item 165 (weight at age 20). It seems likely that the last  
414 two items are included due to collinearity with the gender item and are not linked to substance  
415 use, so they will not be considered legitimate items for this subfactor. Therefore, only gender  
416 will be retained, and on a unitary factor 3.

417

418           **Main Factor 4: Sleep Disordered Breathing (“SDB”),  $\alpha = 0.762$**

419           This factor incorporated 10 of the 12 items from the original SDQ-SA subscale (marked  
420 with “@” in Table 7). This table also lists the items that have a loading of 0.4 or higher on this  
421 factor, in either orthogonal or oblique rotations.

422

423

424 **Table 7: Item loadings on each subfactor of Main Factor 4 (orthogonal rotation).**

425

426

| Item  | 4            | 4A           | 4B     | Source | Brief Item Description                                  |
|-------|--------------|--------------|--------|--------|---------------------------------------------------------|
| 21    | <b>0.744</b> | 0.757        | 0.320  | @      | snore loudly and bother others                          |
| 141   | <b>0.631</b> | 0.711        | 0.172  | @      | snoring / breathing problem worse on back               |
| 22    | <b>0.654</b> | 0.672        | 0.243  | @      | stop breathing in sleep                                 |
| 143   | 0.373        | <b>0.611</b> | 0.058  | -      | snoring / breathing worse with allergy / infection      |
| 23    | <b>0.479</b> | 0.572        | 0.111  | @      | awake suddenly gasping for breath                       |
| 15    | <b>0.463</b> | 0.559        | 0.110  | -      | sleep disturbs bed partner's sleep                      |
| 139   | 0.330        | <b>0.511</b> | -0.054 | -      | nose blocking up when trying to sleep                   |
| 142   | <b>0.409</b> | 0.486        | 0.136  | @      | snoring / breathing problem worse after alcohol         |
| 173   | <b>0.416</b> | 0.309        | 0.136  | @      | age                                                     |
| 71    | <b>0.390</b> | 0.283        | 0.250  | @      | high blood pressure <i>[retained for face validity]</i> |
| 163   | <b>0.722</b> | 0.213        | 0.918  | @      | current weight                                          |
| 165   | <b>0.504</b> | 0.018        | 0.794  | -      | what was your weight at age 20                          |
| 172   | <b>0.636</b> | 0.245        | 0.751  | @      | how tall are you                                        |
| 144   | <b>0.440</b> | 0.405        |        | -      | completed menopause? 1=no . . . 5=agree strongly        |
| “176” | <b>0.636</b> | 0.245        | 0.641  | @      | available via “look-up matrix” using 163 & 172          |

427

428 **Legend for Table 7:**

429 **Item:** Numerical label of this item on the original SDQ;

430 **4:** Main Factor 4, prior to factoring into 4A and 4B. However, after consideration  
431 of weight questions (see discussion in the text), Factor 4 was retained in its entirety

432 **4A:** Subfactor related to symptoms of sleep disordered breathing

433 **4B:** Subfactor related to weight, weight gain, and height

434 **Source:** If marked “@”, item was on the SA (sleep apnea) subscale of the original SDQ

435 If marked “-”, item did not appear on any subscale in the original SDQ.

436

437 We performed a secondary factor analysis on Factor 4 to determine if it was

438 homogenous. The scree plot (S4 Fig.) shows two factors with an eigenvalue > 1. Using an

439 orthogonal rotation, subfactor 4A explained 4.1% of the overall dataset variance while subfactor

440 4B explained 3.6% of the variance. Results for the oblique rotation were not much different.  
441 Subfactor 4A contains items pertaining to breathing difficulties such as “I snore.” Subfactor 4B  
442 contains items concerning gender and weight. Since 4B items also have face validity for an  
443 apnea scale, Main Factor 4 will therefore be regarded as unitary. Item 18 (“I suffer from  
444 heartburn and choking”) did not significantly load on either subfactor nor does it significantly  
445 load on the main factor, so does not merit inclusion in SDQ-2.

446 It is worth noting that items “weight at age 20” and “weight 6 months ago” were  
447 originally included in the SDQ in order to investigate the observation by some sleep medicine  
448 professionals that apnea patients tend to gain weight over time, often rapidly. Therefore, two new  
449 variables “weight gained in the past 6 months” and “weight gained since age 20” were calculated  
450 from existing items. The former did not load significantly on any factor, but “weight gain since  
451 age 20” loaded onto Factor 4 with weight 0.56. The latter has been drafted as a new item for  
452 SDQ-2.

453 Item 144 (“I have gone through the menopause”) will be used only in the female version  
454 of the SDQ-2’s SDB subscale, which will therefore be one item longer than the male version.  
455 Item 172 (“How tall are you?”) has been retained on this subscale, since Item 176 (BMI) will not  
456 be specifically asked about on the SDQ-2. Rather, a 5 x 5 cell look-up table (see S2 Table)  
457 comprised of items 172 (height) and 163 (weight) will be supplied to users to allow them to  
458 make an approximate calculation of BMI if this is desired.

459

## 460 **Factor Analyses by Gender**

461 Gender items were first removed from the dataset, after which it was split into male and  
462 female datasets. Separate factor analyses performed on the latter produced similar factor

463 structures and item loadings. Interestingly, subfactors 2A and 2B (narcolepsy and daytime  
464 sleepiness) came out as their own factors in both the male and female datasets, as opposed to  
465 being subfactors of a Main Factor in the combined dataset. The other factors in the gender-based  
466 analysis did not differ markedly from those in the combined data set.

467 When the gender-related items were put back into the split analyses, none of the four  
468 items for men loaded significantly on any of the main factors. They did load onto their own  
469 separate factor which could be considered a subscale of erectile dysfunction, but these items will  
470 not be included as a separate subscale on the SDQ-2.

471

## 472 **DISCUSSION:**

473 This EFA of the original 176-item SDQ succeeded in its goals. It confirmed and resolved  
474 problems with the 4 subscales of the original SDQ, notably their conflation of general daytime  
475 sleepiness with neurological symptoms of narcolepsy, and a similar conflation of psychiatric  
476 insomnia symptoms with those of simple insomnia disorder. These problems were the result of  
477 the limitations of the original discriminant function analysis, so the superiority of EFA on these  
478 data is therefore confirmed. In addition, the new factors extracted comprised only 66 items,  
479 allowing SDQ-2 to be much quicker to administer than the original questionnaire.

480 The end result of this analysis is the creation of a new questionnaire, the SDQ-2, whose  
481 subscales will consist of the items on the 7 factors described above. These new subscales will be  
482 named: *InsPsy* (psychological features of insomnia), *InsSubj* (subjective estimate of insomnia  
483 severity), *InsPLM* (insomnia due to limb movements), *EDS* (excessive daytime sleepiness), *NAR*  
484 (neurological symptoms of narcolepsy), *SUBST* (sleep effects of substance use), and *SDB* (sleep-  
485 disordered breathing). The fact that a similar factor structure emerged when the dataset was



486 divided into male and female respondents suggests that SDQ-2 may evaluate men and women  
487 equally well, although different cut-off scores indicative of the threshold of pathology will likely  
488 be needed for each gender, as on the original SDQ. On Main Factor 2, SDQ's conflation of two  
489 narcolepsy symptom domains – excessive daytime sleepiness and neurological symptoms of  
490 narcolepsy -- was resolved by extracting subfactors 2A and 2B. Creation of the EDS subscale  
491 also resolved another problem with the original SDQ: it had confounded some of these items  
492 within its PLM and PSY subscales. In effect, InsPSY replaces the original PSY subscale, while  
493 InsPLM replaces the original PLM scale. The new NAR scale fully replaces the original NAR  
494 scale and is now much more specific for the neurological symptoms and signs of narcolepsy,  
495 while the new EDS scale independently evaluates sleepiness from whatever cause.

496         The SDB subscale contained 10 of the 12 original items from the SDQ-SA subscale.  
497 While it had two subfactors, breathing difficulties and obesity, having a subscale consisting  
498 entirely of weight-related questions was not thought to be useful, so these items were included in  
499 Factor 4 to produce a unitary SDB subscale. Although BMI is no longer an item on SDQ-2, its  
500 statistical contribution to the SDB scale is preserved by the 5-level height and weight items. For  
501 those users wishing to have a numerical estimate of BMI, the look-up matrix using these two  
502 items is shown in S2 Table.

503         An assessment of weight gain on the original SDQ required a clinician to perform  
504 calculations using items “current weight” and “weight at age 20”. This task will be replaced on  
505 SDQ-2 by a new item that asks the patient directly how much weight (if any) they have gained  
506 since they were 20 years old; this new item loads on the SDB scale.

507         Of the five SDQ questions for women, only item 144 “I have gone through the  
508 menopause” loaded significantly onto any of the 7 factors -- SDB. There is some evidence<sup>[41]</sup>

509 that lower estrogen levels after menopause cause a lessening of muscle tone, which might  
510 aggravate sleep apnea, so this item will be included in the SDQ-2. The other gender-related  
511 questions will be discarded.

512           Being shorter than the original SDQ, the SDQ-2 is expected to have a higher completion  
513 rate among patients and to be quicker to complete. As noted above, the 7 new subscales should  
514 resolve the original SDQ's inadvertent over-diagnosis of narcolepsy and psychiatric features of  
515 insomnia, as identified by Schwegler[8]. The new insomnia subscales also validate the work of  
516 Schweer[40] and Brower[37] who proposed insomnia subscales made up of existing SDQ items.  
517 In fact, 13 of the 16 items on Sweere's *Insomnia* scale appear on Main Factor 1 in the present  
518 study.

519           Nevertheless, there are some cautionary notes. The sample of SDQ respondents upon  
520 which the present study is based was not a random population sample. Most were either referred  
521 to sleep disorder clinics with a suspected sleep disorder or were patients with another known  
522 disorder that was suspected of causing sleep-wake symptoms, i.e., depression, schizophrenia,  
523 alcoholism, chronic fatigue syndrome, or general medical illness. Other respondents were  
524 normal university students in psychology courses or healthy control participants in clinical  
525 research studies.

526           In this retrospective dataset, there were no structured interview diagnoses of respondents'  
527 sleep disorders, psychiatric illnesses, or general medical conditions. Likewise, no racial / ethnic /  
528 cultural information was available. Although some clinical diagnoses unrelated to sleep were  
529 available, these were made by numerous clinicians in different hospitals in different years and  
530 without uniform diagnostic criteria.

531 Another caution is that the data upon which the current study is based were collected over  
532 a long time span, some being almost 35 years old. During this interval there were changes in  
533 clinical nosology and polysomnographic measurement techniques, not to mention cultural and  
534 linguistic changes. It is therefore possible that the response set of the respondents was not  
535 homogeneous, introducing further error variance. On the positive side, such issues would, again,  
536 be somewhat mitigated by the large sample size.

537 The present paper does not show any validation of the new subscales, although most of  
538 the respondents had polysomnography. In fact, only 78 persons in this study were normal  
539 controls who had no sleep complaints but even they were not age-matched to patients and did not  
540 have polysomnography. Therefore, the factor structure reported here needs to be confirmed in  
541 larger samples, hopefully including normal persons age-matched to polysomnographically-  
542 diagnosed patients. In future validation studies, an ROC analysis of each SDQ-2 subscale will be  
543 very informative and will likely find different cut-off scores in men versus women to indicate the  
544 threshold for pathology.

545 Previous studies of the original SDQ-SA subscale by other authors -- using patients that  
546 were not included in the present study -- have shown its accurate identification of sleep apnea.  
547 Hopefully, future convergent and divergent validity studies of the new SDQ-2 subscales using  
548 psychometric and physiological assessments will show even greater precision.

549 The 7 subscales proposed in the present article will allow re-analysis of SDQ datasets  
550 gathered by different investigators over the years; these contain the responses of tens of  
551 thousands of persons. Especially in those datasets from controlled studies of PTSD, CFS,  
552 depression, and anxiety, it is possible that new insights into those patients' symptoms could be  
553 obtained via these new subscales.

554 It should be noted that all of the subscales extracted by EFA in this article are based on  
555 the exact wording and item-numbering of the original SDQ. It is for this reason that  
556 retrospective analyses can be done on old SDQ data. However, on the new SDQ-2 questionnaire  
557 there will be substantial changes in item-numbering plus a change in the form of Likert response  
558 choices: from 1 . . . 5 on the original SDQ to 0 . . . 4 on the SDQ-2. There will also be re-  
559 wording of several items to give greater precision in symptom description, plus a general  
560 rewording to avoid adjectives about magnitude or intensity in the items' stems. For those users  
561 wishing to continue using the original SDQ, it is suggested that the 4 original subscales be retired  
562 in favour of the 7 new ones. For those users of the new 66-item SDQ-2, it will only be possible  
563 to score it by using the 7 new scales.

564 Future goals for the SDQ-2 include studies of test-retest reliability plus validity studies  
565 using other questionnaires and physiological measures. It is hoped that these will be done both in  
566 the original English version and in the translated versions, which in some cases would be the first  
567 validation of those translations. Such validation would facilitate comparison studies between  
568 occupational, cultural, linguistic, and geographical groups.

569 A prospective study of 800 members of a large urban police force has been completed, in  
570 which the 7 new SDQ-2 subscales were concurrently validated against a number of published  
571 sleep and psychological questionnaires: ESS[9], ISI[42], STOP-Bang[15], Berlin  
572 Questionnaire[14], GAD-7[43], PHQ-9[44], MIES[45], PCL-5[46], and CAGE[47]. A  
573 manuscript on this subject is in preparation.

574 The new SDQ-2 should have more clinical utility than the original SDQ, in that it  
575 identifies a greater range of sleep pathologies and does it with better precision. It may also  
576 supplant various shorter single-disorder questionnaires.

577 SDQ-2 will be available for distribution from the University of Ottawa's Institute of

578 Mental Health Research at the Royal (<https://www.theroyal.ca/research/sleep-mental-health->

579 [research](#)). Technical questions can be sent by email to Dr. Douglass.

580

581

## 582 **Author Contributions**

583 Conceptualization: Alan Douglass, Kathleen Biard

584 Data Curation: Kathleen Biard, Alan Douglass,

585 Formal Analysis: Kathleen Biard, Alan Douglass,

586 Methodology: Alan Douglass, Kathleen Biard, Joseph De Koninck

587 Project Administration: Alan Douglass, Joseph De Koninck

588 Supervision: Alan Douglass, Joseph De Koninck

589 Writing – original draft: Alan Douglass, Kathleen Biard

590 Writing – review and editing: Alan Douglass, Kathleen Biard, Joseph De Koninck

591

592

## 593 **Acknowledgements**

594 Sleep Disorders Clinic, Royal Ottawa Mental Health Center (Drs. Alan Douglass, Elliott Lee,  
595 and Louis Soucy) and The University of Ottawa Institute of Mental Health Research at the  
596 Royal, Ottawa, Ontario, Canada

597  
598 University of Michigan Psychiatry Department (Drs. John Greden, Mark Demitrack, Israel  
599 Liberzon, Kirk Brower, Alan Douglass) and Neurology Sleep Disorders Clinic (Drs. Michael  
600 Aldrich, Ronald Chervin), UM Medical Center, Ann Arbor, Michigan, USA

601  
602 Sleep Disorders Center, Stanford University Medical Center (Drs. Christian Guilleminault,  
603 William C. Dement, Sharon Keenan RPsGT), Palo Alto, California, USA.

604  
605 Sleep Disorders Clinic, University of Alberta Hospital (Drs. Alan Douglass and Godfrey Man;  
606 Rhoda Schreiner RPsGT), Edmonton, AB, Canada.

607  
608 Psychology Dept., University of Alberta (Dr. Don Kuiken), Edmonton, AB, Canada

609  
610 Harborview Medical Center, University of Washington (Dr. Dedra Buchwald), Seattle,  
611 Washington, USA

612  
613 Sleep Disorders Clinic, Isaac Walton Killam Hospital, Dalhousie University (Dr. Rachel  
614 Moorehouse), Halifax, Nova Scotia, Canada.

615

## 616 **References**

- 617 1. Douglass AB, Bornstein R, Nino-Murcia G, Keenan S, Miles L, Zarcone VPJ, et al. The  
618 Sleep Disorders Questionnaire. I: Creation and multivariate structure of SDQ. *Sleep*.  
619 1994;17(2):160-7.
- 620
- 621 2. Miles LE. The Sleep Questionnaire and Assessment of Wakefulness. In: Guilleminault C,  
622 editor. *Sleeping and waking disorders, indications and techniques*. Menlo Park, CA: Addison-  
623 Wesley Pub. Co. Medical/Nursing Division: 1982. p. 383–413.
- 624
- 625 3. Douglass AB. Item test-retest reliability of the Sleep Disorders Questionnaire (SDQ).  
626 *Sleep Research*. 1990;19:215.
- 627
- 628 4. Buysse DJ, Reynolds Cd, Monk TH, Berman SR, Kupfer DJ. The Pittsburgh Sleep  
629 Quality Index: a new instrument for psychiatric practice and research. *Psychiatry Res*.  
630 1989;28(2):193-213.
- 631
- 632 5. Guichard K, Marti-Soler H, Micoulaud-Franchi JA, Philip P, Marques-Vidal P,  
633 Vollenweider P, et al. The NoSAS score: A new and simple screening tool for obstructive sleep  
634 apnea syndrome in depressive disorder. *J Affect Disord*. 2018;227:136-40.
- 635
- 636 6. Valipour A, Lavie P, Lothaller H, Mikulic I, Burghuber OC. Sleep profile and symptoms  
637 of sleep disorders in patients with stable mild to moderate chronic obstructive pulmonary  
638 disease. *Sleep Med*. 2011;12(4):367-72.



- 639
- 640 7. Valipour A, Lothaller H, Rauscher H, Zwick H, Burghuber OC, Lavie P. Gender-related  
641 differences in symptoms of patients with suspected breathing disorders in sleep: a clinical  
642 population study using the sleep disorders questionnaire. *Sleep*. 2007;30(3):312-9.
- 643
- 644 8. Schwegler K, Klaghofer R, Nirrko AC, Mathis J, Hersberger KE, Bloch KE. Sleep and  
645 wakefulness disturbances in Swiss pharmacy customers. *Swiss Medical Weekly*. 2006;136(9-  
646 10):149-54.
- 647
- 648 9. Johns MW. A new method for measuring daytime sleepiness: the Epworth Sleepiness  
649 Scale. *Sleep*. 1991;14(6):540-5.
- 650
- 651 10. Valencia-Flores M, Resendiz M, Castano VA, Santiago V, Campos RM, Sandino S, et al.  
652 Objective and subjective sleep disturbances in patients with systemic lupus erythematosus.  
653 *Arthritis And Rheumatism*. 1999;42(10):2189-93.
- 654
- 655 11. McCurry SM, Gibbons LE, Logsdon RG, Vitiello MV, Teri L. Nighttime insomnia  
656 treatment and education for Alzheimer's disease: A randomized, controlled trial. *Journal of the*  
657 *American Geriatrics Society*. 2005;53(5):793-802.
- 658
- 659 12. Longstreth WT, Koepsell TD, Ton TG, Hendrickson AF, Van Belle G. The epidemiology  
660 of narcolepsy. *Sleep*. 2007;30(1):13-26.
- 661

- 662 13. Happe S, SchrodL B, Faltl M, Muller C, Auff E, Zeitlhofer J. Sleep disorders and  
663 depression in patients with Parkinson's disease. *Acta Neurol Scand.* 2001;104(5):275-80.  
664
- 665 14. Netzer NC, Stoohs RA, Netzer CM, Clark K, Strohl KP. Using the Berlin Questionnaire  
666 to identify patients at risk for the sleep apnea syndrome. *Annals of Internal Medicine.*  
667 1999;131:485-91.  
668
- 669 15. Chung F, Yegneswaran B, Liao P, Chung SA, Vairavanathan S, Islam S, et al. STOP  
670 questionnaire - A tool to screen patients for obstructive sleep apnea. *Anesthesiology.*  
671 2008;108(5):812-21.  
672
- 673 16. Marti-Soler H, Hirotsu C, Marques-Vidal P, Vollenweider P, Waeber G, Preisig M, et al.  
674 The NoSAS score for screening of sleep-disordered breathing: a derivation and validation study.  
675 *Lancet Respir Med.* 2016;4(9):742-8.  
676
- 677 17. Chai-Coetzer CL, Antic NA, Rowland LS, Catcheside PG, Esterman A, Reed RL, et al. A  
678 simplified model of screening questionnaire and home monitoring for obstructive sleep apnoea in  
679 primary care. *Thorax.* 2011;66(3):213-9.  
680
- 681 18. Schotland HM, Georeno AM, Pack AI. Obstructive sleep apnea: feasibility of a disease  
682 management strategy utilizing primary care case finding. *Journal of Clinical Outcomes*  
683 *Management.* 2000;7(7):34-8.  
684

- 685 19. Chihorek AM, Abou-Khalil B, Malow BA. Obstructive sleep apnea is associated with  
686 seizure occurrence in older adults with epilepsy. *Neurology*. 2007;69(19):1823-7.  
687
- 688 20. Lancaster LH, Mason WR, Parnell JA, Rice TW, Lloyd JE, Milstone AP, et al.  
689 Obstructive sleep apnea is common in idiopathic pulmonary fibrosis. *Chest*. 2009;136(3):772-8.  
690
- 691 21. Abrishami A, Khajehdehi A, Chung F. A systematic review of screening questionnaires  
692 for obstructive sleep apnea. *Canadian Journal of Anaesthesia-Journal Canadien D'Anesthesie*.  
693 2010;57(5):423-38.  
694
- 695 22. Chervin RD. Use of clinical tools and tests in sleep medicine. In: Kryger MH, Roth T,  
696 Dement WC, editors. *Principles and Practice of Sleep Medicine*, 3 ed. Philadelphia: W. B.  
697 Saunders; 2000. p. 535-46.  
698
- 699 23. Ramachandran SK, Josephs LA. A meta-analysis of clinical screening tests for  
700 obstructive sleep apnea. *Anesthesiology*. 2009;110(4):928-39.  
701
- 702 24. Seetho IW, Wilding JP. Screening for obstructive sleep apnoea in obesity and diabetes--  
703 potential for future approaches. *Eur J Clin Invest*. 2013;43(6):640-55.  
704  
705

- 706 25. Economou NT, Dikeos D, Andrews N, Foldvary-Schaefer N. Use of the Sleep Apnea  
707 Scale of the Sleep Disorders Questionnaire (SA-SDQ) in adults with epilepsy. *Epilepsy Behav.*  
708 2014;31:123-6.  
709
- 710 26. Klingman KJ, Jungquist CR, Perlis ML. Questionnaires that screen for multiple sleep  
711 disorders. *Sleep Med Rev.* 2017;32:37-44.  
712
- 713 27. Lichtblau M, Bratton D, Giroud P, Weiler T, Bloch KE, Brack T. Risk of sleepiness-  
714 related accidents in Switzerland: results of an online sleep apnea risk questionnaire and  
715 awareness campaigns. *Front Med (Lausanne).* 2017;4:34.  
716
- 717 28. Malow BA, Bowes RJ, Lin X. Predictors of sleepiness in epilepsy patients. *Sleep.*  
718 1997;20(12):1105-10.  
719
- 720 29. Weatherwax KJ, Malow BA. The use of the Sleep Apnea Scale of the Sleep Disorders  
721 Questionnaire in patients with epilepsy. *Sleep.* 2003;26:A223.  
722
- 723 30. Bassetti C, Aldrich MS, Chervin RD, Quint D. Sleep apnea in patients with transient  
724 ischemic attack and stroke: a prospective study of 59 patients. *Neurology.* 1996;47(5):1167-73.  
725
- 726 31. Sacco RL. Risk factors and outcomes for ischemic stroke. *Neurology.* 1995;45(2 Suppl  
727 1):S10-4.  
728

- 729 32. Bronner LL, Kanter DS, Manson JE. Primary prevention of stroke. *N Engl J Med.*  
730 1995;333(21):1392-400.  
731
- 732 33. Bassetti C, Aldrich MS, Quint D. Sleep-disordered breathing in patients with acute supra-  
733 and infratentorial strokes. A prospective study of 39 patients. *Stroke.* 1997;28(9):1765-72.  
734
- 735 34. Valencia-Flores M, Orea A, Castano VA, Resendiz M, Rosales M. Prevalence of sleep  
736 apnea and electrocardiographic disturbances in morbidly obese patients. *Obesity Res.*  
737 2000;8(3):262-9.  
738
- 739 35. Douglass AB. Validation of the "Psych" scale of the Sleep Disorders Questionnaire  
740 (SDQ). *Sleep Research.* 1992;21:150.  
741
- 742 36. Carroll BJ, Feinberg M, Smouse PE, Rawson SG, Greden JF. The Carroll Rating Scale  
743 for Depression I: development, reliability, and validation. *British Journal of Psychiatry.*  
744 1981;138(3):194-200.  
745
- 746 37. Brower KJ, Aldrich MS, Hall JM. Polysomnographic and subjective sleep predictors of  
747 alcoholic relapse. *Alcohol Clin Exp Res.* 1998;22(8):1864-71.  
748
- 749 38. Smith S, Trinder J. Detecting insomnia: comparison of four self-report measures of sleep  
750 in a young adult population. *Journal Of Sleep Research.* 2001;10(3):229-35.  
751

752 39. Chesson A, Jr., Hartse K, Anderson WM, Davila D, Johnson S, Littner M, et al. Practice  
753 parameters for the evaluation of chronic insomnia. An American Academy of Sleep Medicine  
754 report. Standards of Practice Committee of the American Academy of Sleep Medicine. *Sleep*.  
755 2000;23(2):237-41.

756

757 40. Sweere Y, Kerkhof GA, De Weerd AW, Kamphuisen HAC, Kemp B, Schimsheimer RJ.  
758 The validity of the Dutch Sleep Disorders Questionnaire (SDQ). *J Psychosom Res*.  
759 1998;45(6):549-55.

760

761 41. Perger E, Mattaliano P, Lombardi C. Menopause and sleep apnea. *Maturitas*.  
762 2019;124:35-8.

763

764 42. Morin CM, Belleville G, Belanger L, Ivers H. The Insomnia Severity Index:  
765 psychometric indicators to detect insomnia cases and evaluate treatment response. *Sleep*.  
766 2011;34(5):601-8.

767

768 43. Spitzer RL, Kroenke K, Williams JB, Lowe B. A brief measure for assessing generalized  
769 anxiety disorder: the GAD-7. *Arch Intern Med*. 2006;166(10):1092-7.

770

771 44. Martin A, Rief W, Klaiberg A, Braehler E. Validity of the Brief Patient Health  
772 Questionnaire mood scale (PHQ-9) in the general population. *Gen Hosp Psychiatry*.  
773 2006;28(1):71-7.

774

- 775 45. Nash WP, Marino Carper TL, Mills MA, Au T, Goldsmith A, Litz BT. Psychometric  
776 evaluation of the Moral Injury Events Scale. *Mil Med.* 2013;178(6):646-52.  
777
- 778 46. Ashbaugh AR, Houle-Johnson S, Herbert C, El-Hage W, Brunet A. Psychometric  
779 validation of the English and French versions of the Posttraumatic Stress Disorder Checklist for  
780 DSM-5 (PCL-5). *PLoS One.* 2016;11(10):e0161645.  
781
- 782 47. Nilssen O, Ries RK, Rivara FP, Gurney JG, Jurkovich GJ. The CAGE questionnaire and  
783 the Short Michigan Alcohol Screening Test in trauma patients: comparison of their correlations  
784 with biological alcohol markers. *J Trauma.* 1994;36(6):784-8.

**Fig. 1: Scree Plot of EFA Factors (eigenvalues > 1.)**

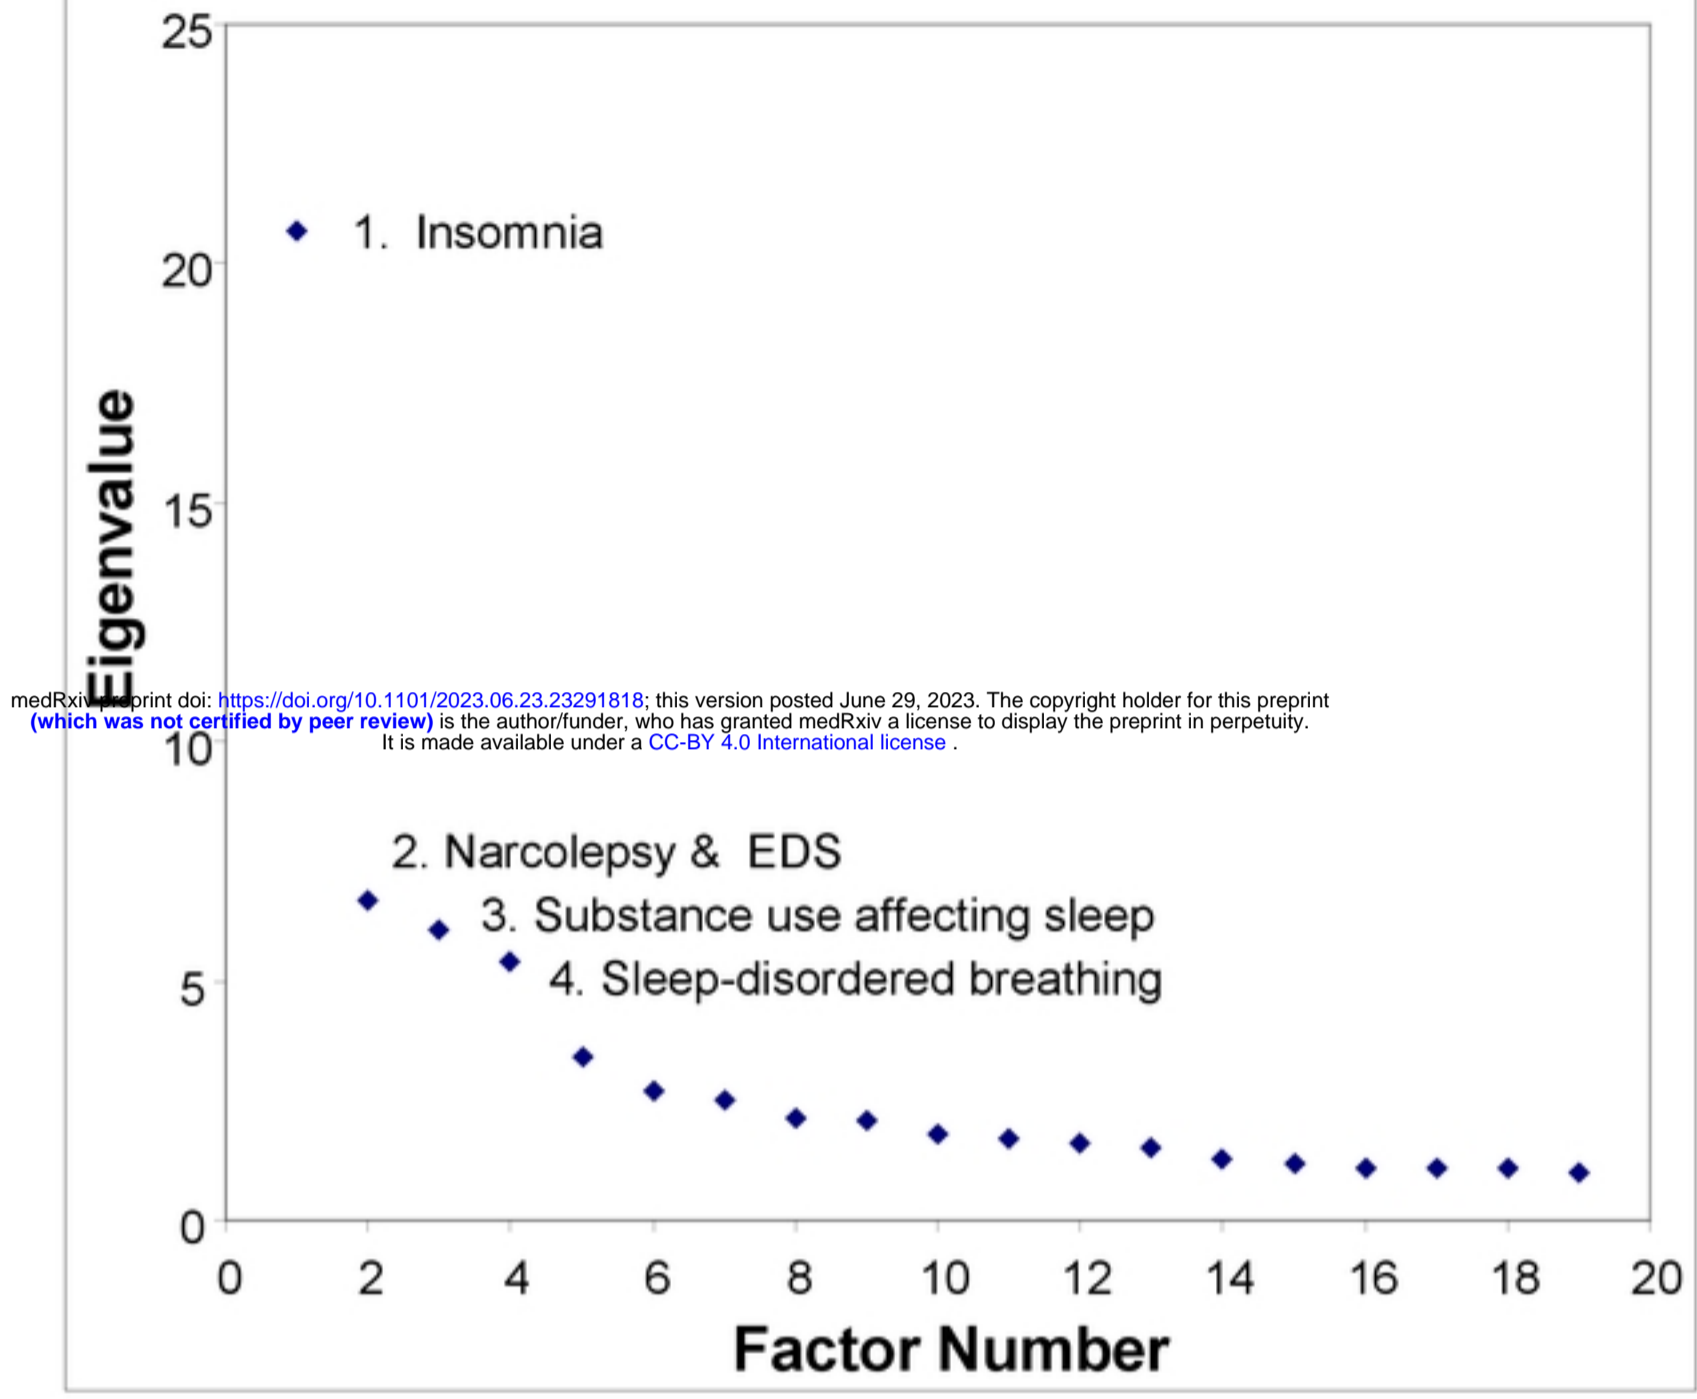

Figure 1., Scree Plot
